# Supplementary material for: Biological Activity and Molecular Structures of Bis(benzimidazole) and Trithiocyanurate Complexes
Source: PubMed Central journal article supplement (PMC6272323; doi:10.3390/molecules200610360), 2015-06-04
Supplement: molecules-20-10360-s001.pdf [file molecules-20-10360-s001.pdf]

## Supplementary Materials

**Table S1.** Hydrogen bonds for **1** (Å, °).

| D-H...A                      | d(D-H) | d(H...A) | d(D...A) | <(DHA) |
|------------------------------|--------|----------|----------|--------|
| N2A-H2A...O34 <sup>i</sup>   | 0.88   | 2.19     | 2.958(5) | 146    |
| N2A-H2A...O2 <sup>ii</sup>   | 0.88   | 2.37     | 3.079(5) | 138    |
| N2B-H2B...O1S                | 0.88   | 1.96     | 2.811(5) | 161    |
| N2C-H2C...O33 <sup>iii</sup> | 0.88   | 2.13     | 2.890(5) | 145    |
| N2D-H2D...O14 <sup>iv</sup>  | 0.88   | 2.02     | 2.894(6) | 177    |
| N2E-H2E...O24 <sup>v</sup>   | 0.88   | 2.03     | 2.893(5) | 166    |
| N2F-H2F...O2W                | 0.88   | 1.96     | 2.818(6) | 164    |
| O1S-H1S...O1W                | 0.84   | 1.92     | 2.740(7) | 165    |

Symmetry transformations used to generate equivalent atoms: (i):  $x, y, z + 1$ ; (ii):  $-x + 1, -y + 1, -z + 2$ ; (iii):  $x - 1, y, z$ ; (iv):  $-x + 1, -y + 1, -z + 1$ ; (v):  $-x + 1, -y, -z + 1$ .

**Table S2.** Hydrogen bonds for **2** (Å, °).

| D-H...A                      | d(D-H)  | d(H...A) | d(D...A) | <(DHA) |
|------------------------------|---------|----------|----------|--------|
| N1A-H1A...N3D                | 0.88    | 1.85     | 2.719(4) | 169    |
| N2A-H2A...O1                 | 0.88    | 1.97     | 2.818(4) | 160    |
| N1B-H1B...N1E                | 0.88    | 2.46     | 3.160(4) | 136    |
| N1B-H1B...S1E                | 0.88    | 2.48     | 3.295(3) | 154    |
| N2B-H2B...S2E <sup>i</sup>   | 0.88    | 2.48     | 3.274(3) | 151    |
| N2B-H2B...N1E <sup>i</sup>   | 0.88    | 2.57     | 3.125(4) | 122    |
| N1C-H1C...S2E <sup>ii</sup>  | 0.88    | 2.42     | 3.273(3) | 164    |
| N2C-H2C...S1E <sup>iii</sup> | 0.88    | 2.40     | 3.274(3) | 172    |
| N3C-H3C...O1                 | 0.88    | 2.10     | 2.952(4) | 162    |
| N1D-H1D...S1D <sup>iv</sup>  | 0.88    | 2.49     | 3.359(3) | 168    |
| N2D-H2D...S3D <sup>v</sup>   | 0.88    | 2.43     | 3.306(3) | 174    |
| N2E-H2E...S1C <sup>vi</sup>  | 0.88    | 2.42     | 3.287(3) | 170    |
| N3E-H3E...S3C <sup>vii</sup> | 0.88    | 2.45     | 3.330(3) | 175    |
| O1-H1...S3D <sup>viii</sup>  | 0.80(5) | 2.53(5)  | 3.302(3) | 164    |
| O1-H2...S1C                  | 0.83(5) | 2.88(5)  | 3.344(3) | 117    |

Symmetry transformations used to generate equivalent atoms: (i):  $-x, -y + 2, -z + 2$ ; (ii):  $x, y - 1, z + 1$ ; (iii):  $x, y, z + 1$ ; (iv):  $-x + 1, -y + 2, -z + 1$ ; (v):  $-x + 1, -y + 1, -z + 1$ ; (vi):  $x, y + 1, z - 1$ ; (vii):  $x, y, z - 1$ ; (viii):  $-x + 1, -y + 1, -z + 2$ .

Electrochemical behaviour of the prepared complexes was studied in water solution using cyclic voltammetry. Electrochemical measurements were performed with an AUTOLAB Analyzer (Metrohm, Herisau, Switzerland) connected to a VA-Stand 663 (Metrohm), using a standard cell with three electrodes. The three-electrode cell used a reference  $\text{Li}^+/\text{Li}$  electrode (E0 of the ferrocene/ferrocenium couple +470 mV) with a Luggine capillary and a Pt wire sealed in glass (0.5 mm diameter, 0.00196 cm<sup>2</sup>). For smoothing and baseline correction the software GPES 4.9 supplied by EcoChemie (Utrecht, Netherlands) was employed. The analysed samples were deoxygenated prior to measurements by purging with argon (99.999%) for 120 s. All experiments were carried out at room temperature 20 °C. Tetramethylammonium perchlorate (TMAP, 0.1 M) was used as supporting electrolyte and the solutions were  $1 \times 10^{-3}$  M in complex. All the potentials are referred against

reference electrode used in this work. The CV studies were also performed in the presence of serum as a function of time and also in a growth medium which contained 10 g/L of glucose, 10 g/L of tryptone (mixture of aminoacids) and 5 g/L of yeast extract at pH 7. The result of the study shows on the stability of the complexes (see Figure S1).

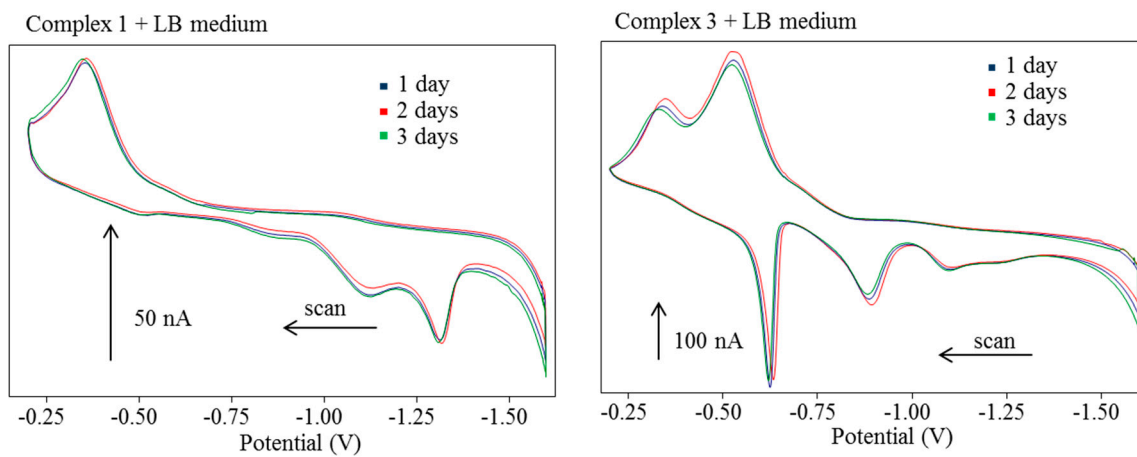

**Figure S1.** Cyclic voltammograms of the complexes **1** and **3** measured in LB medium.
